# Supplementary material for: Comprehensive characterization of the neurogenic and neuroprotective action of a novel TrkB agonist using mouse and human stem cell models of Alzheimer’s disease
Source: PubMed Central journal article supplement (PMC11227723; doi:10.1186/s13287-024-03818-w), 2024-07-06

Figure 1A\_WB1

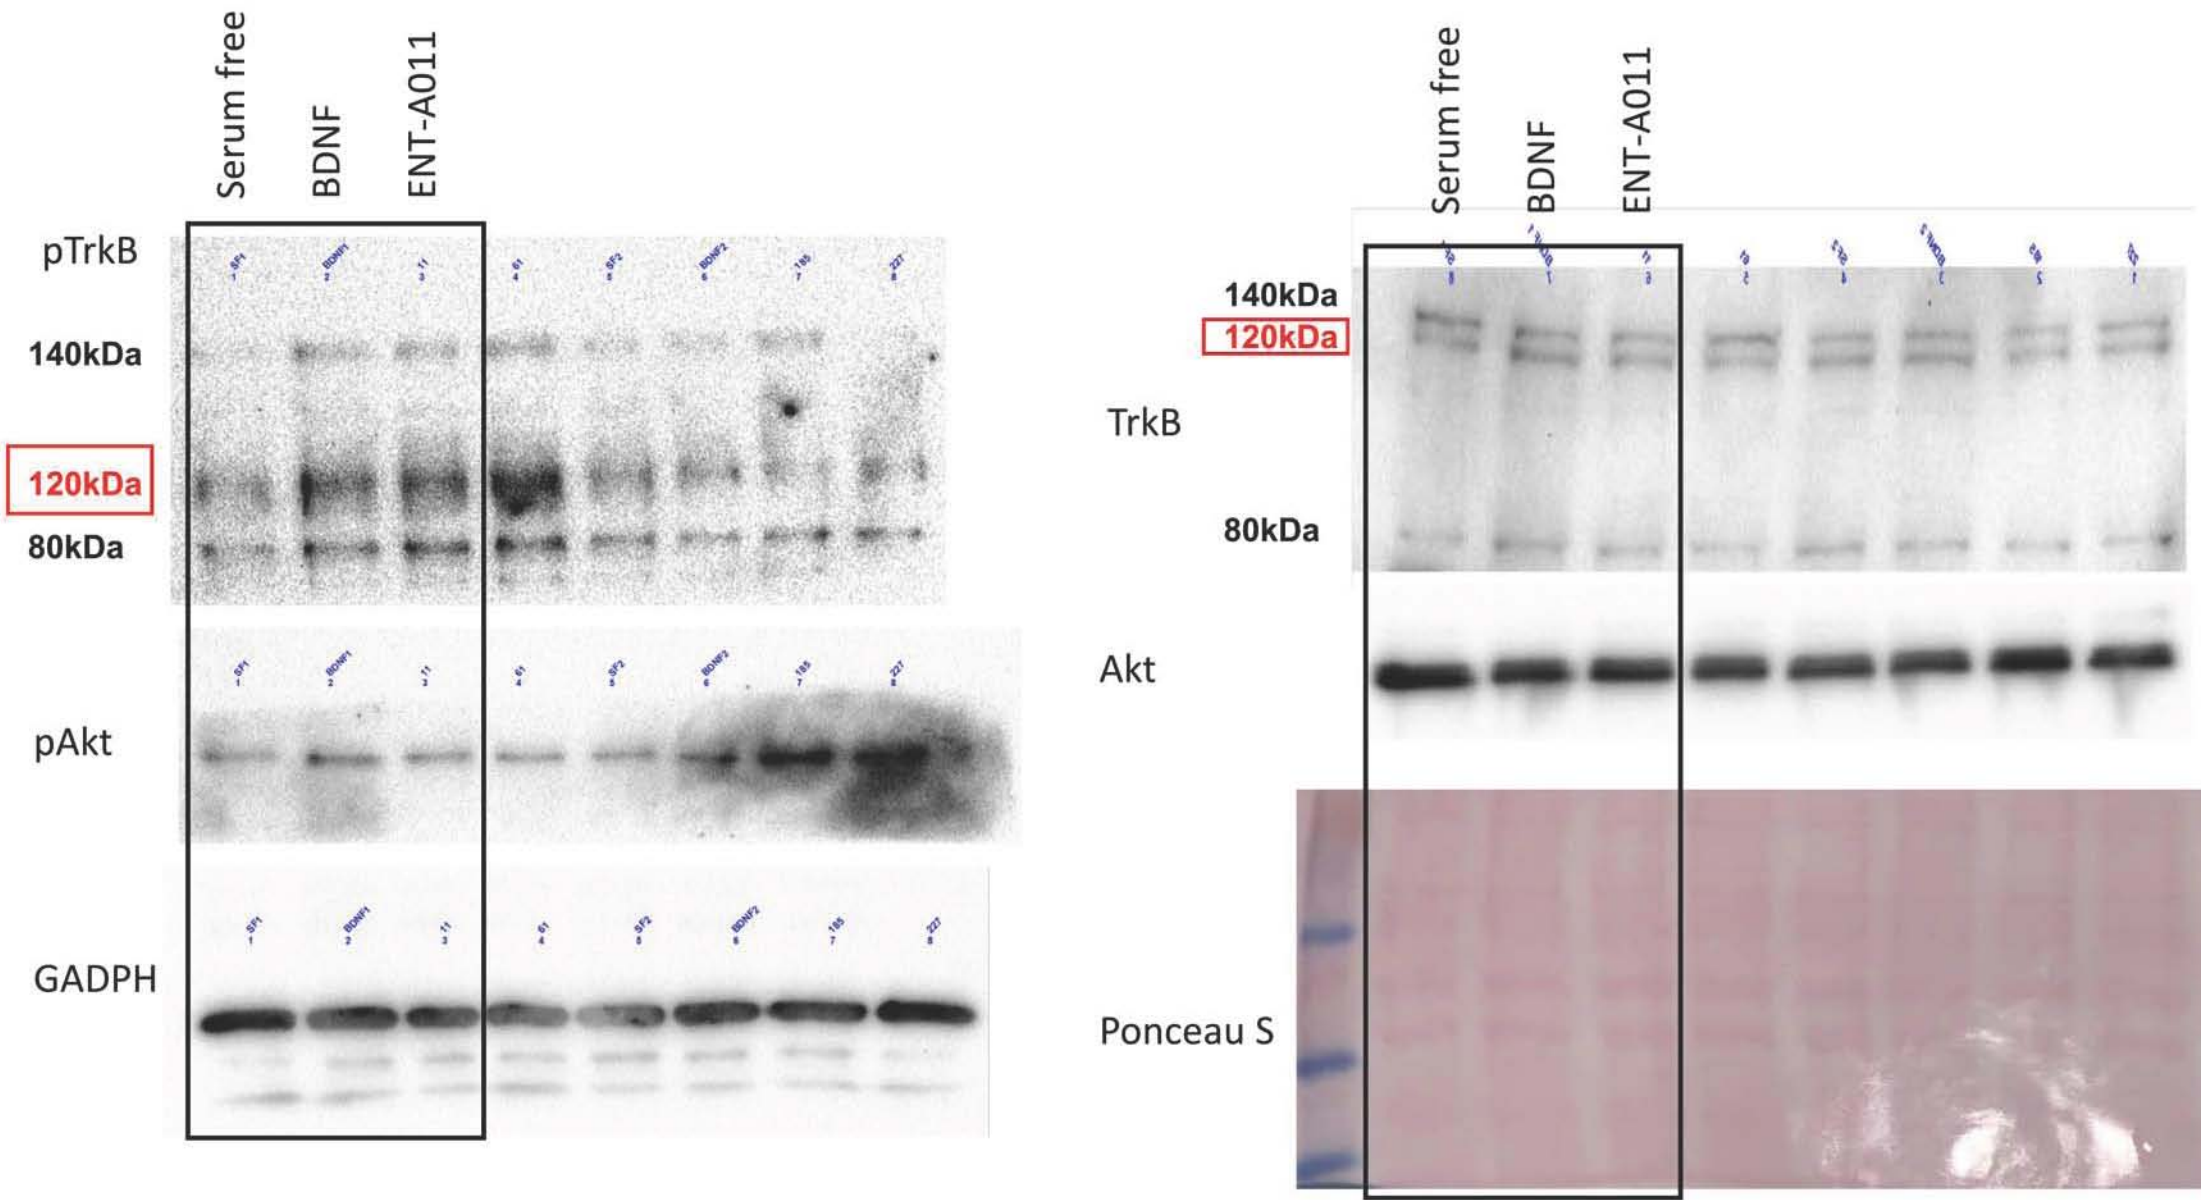

Figure 1A\_WB2

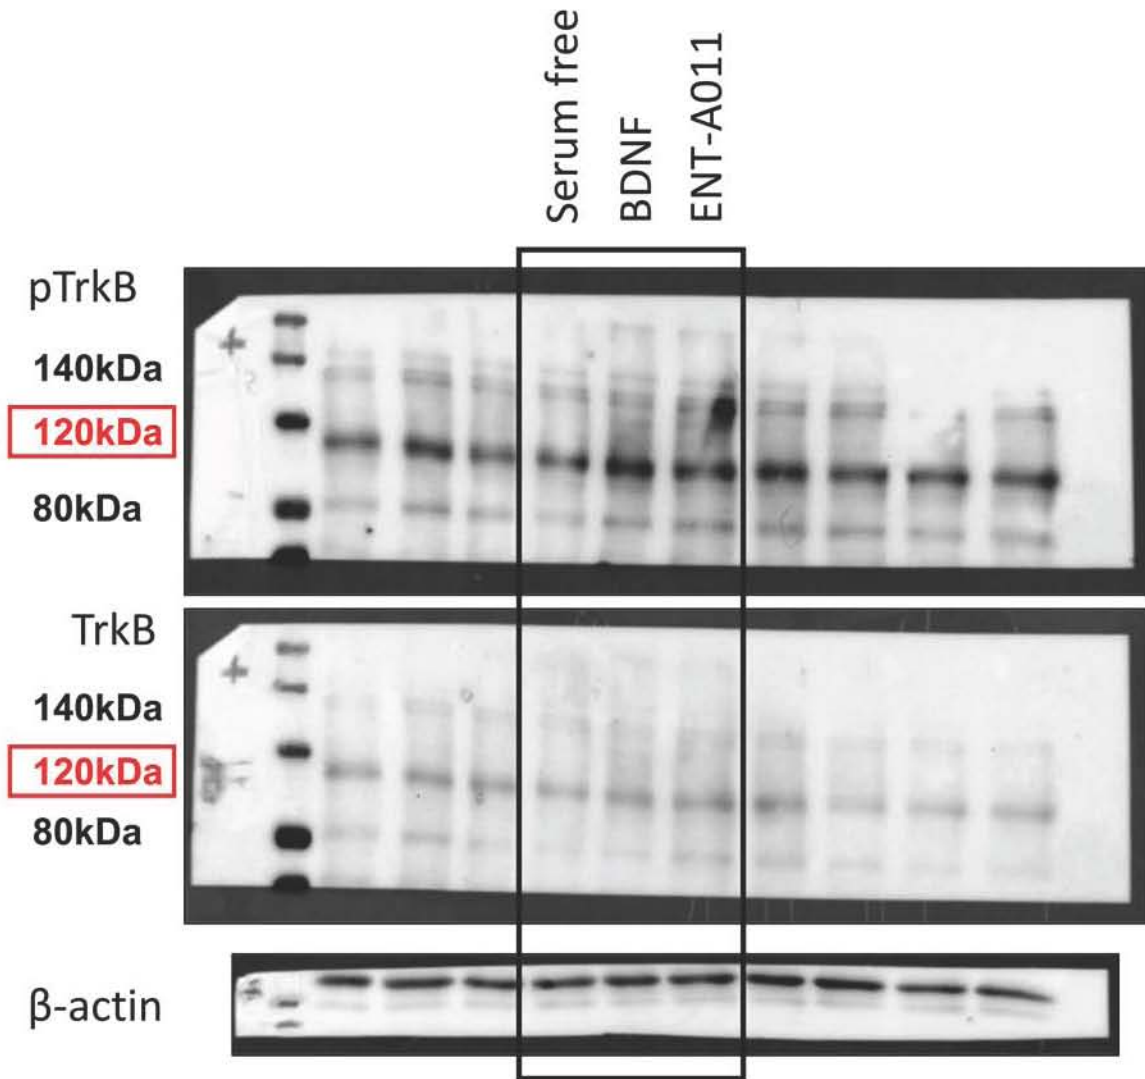

Figure 1A\_WB3

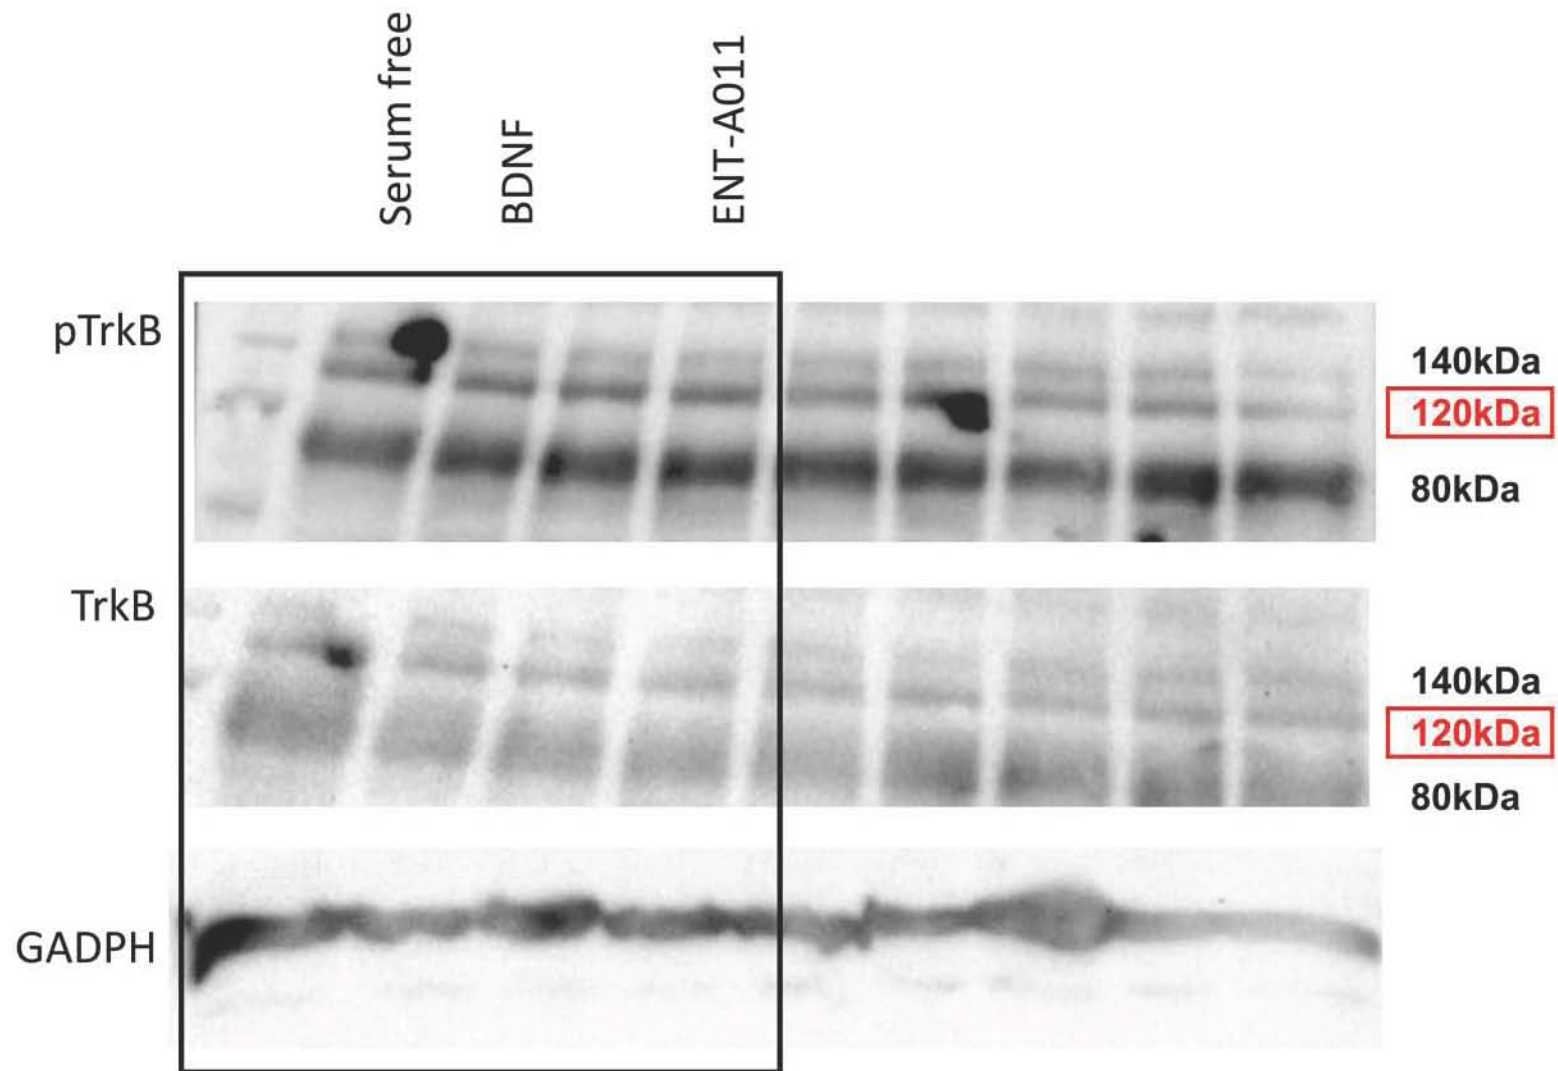

Figure 1A\_WB4

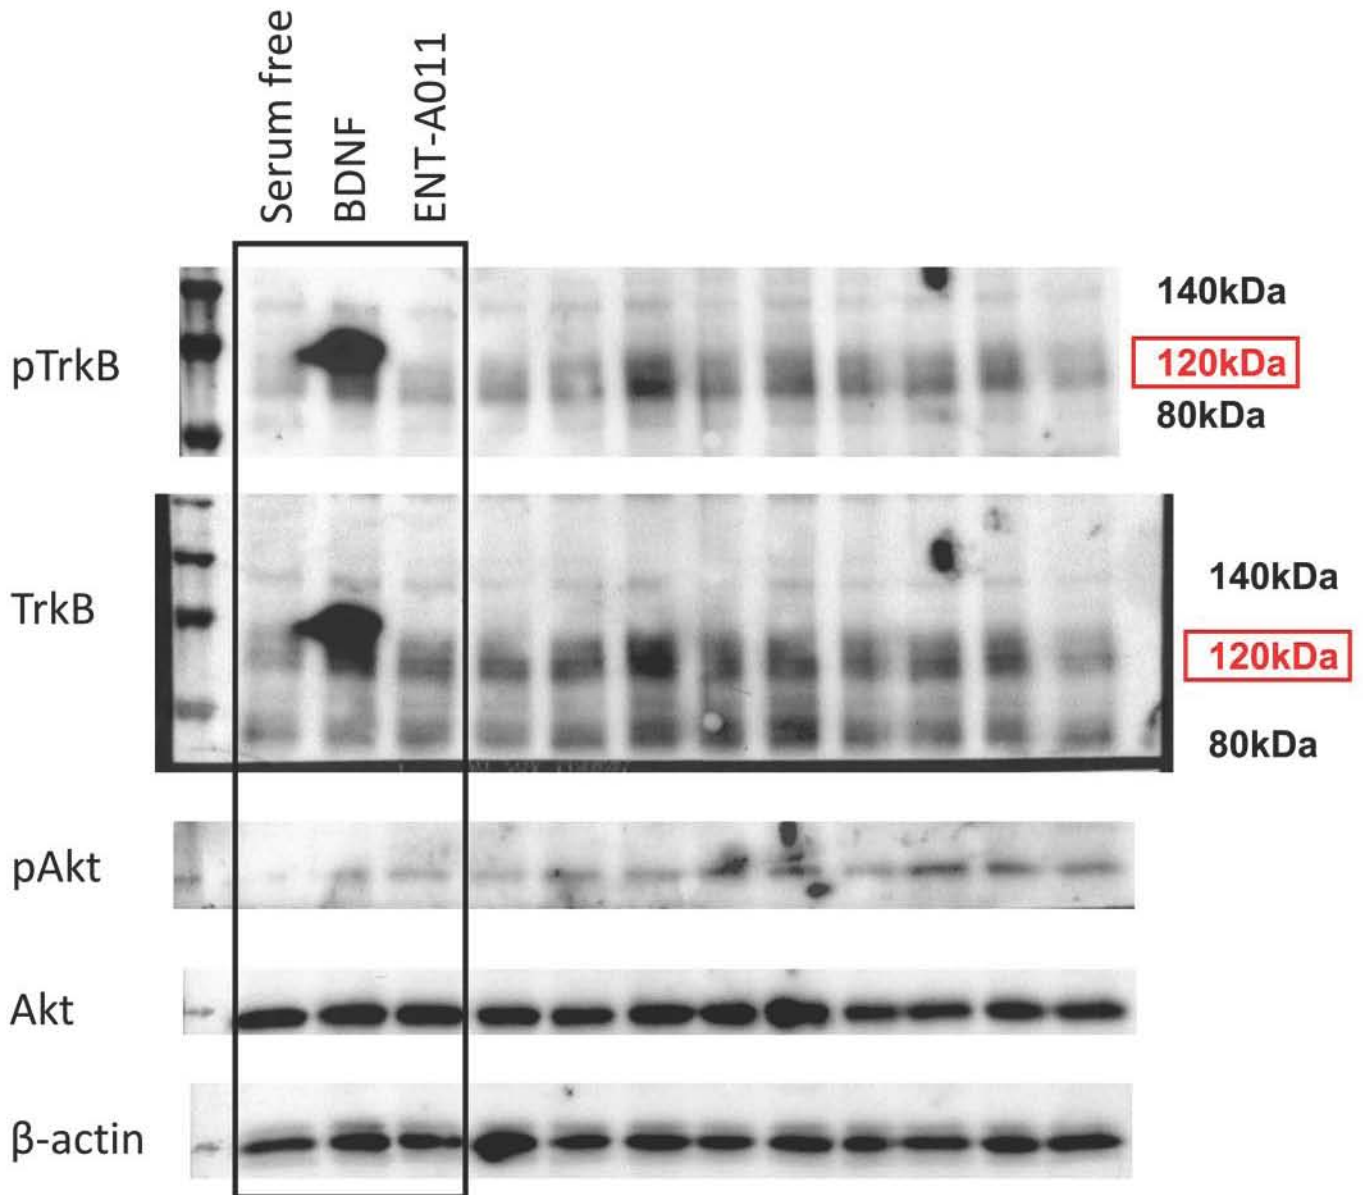

Figure 1A\_WB5

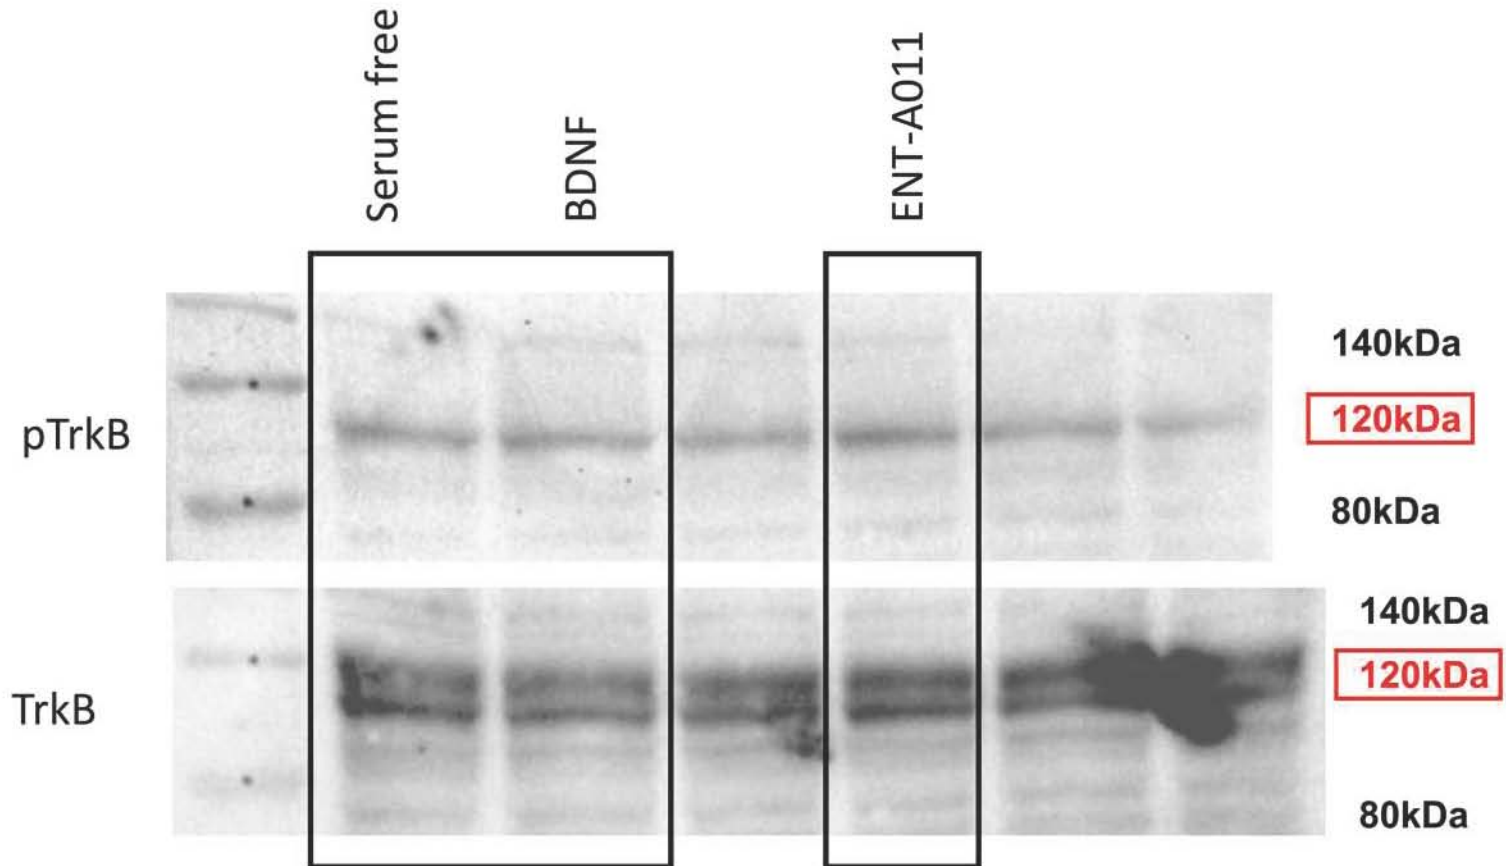

Figure 1A\_WB6

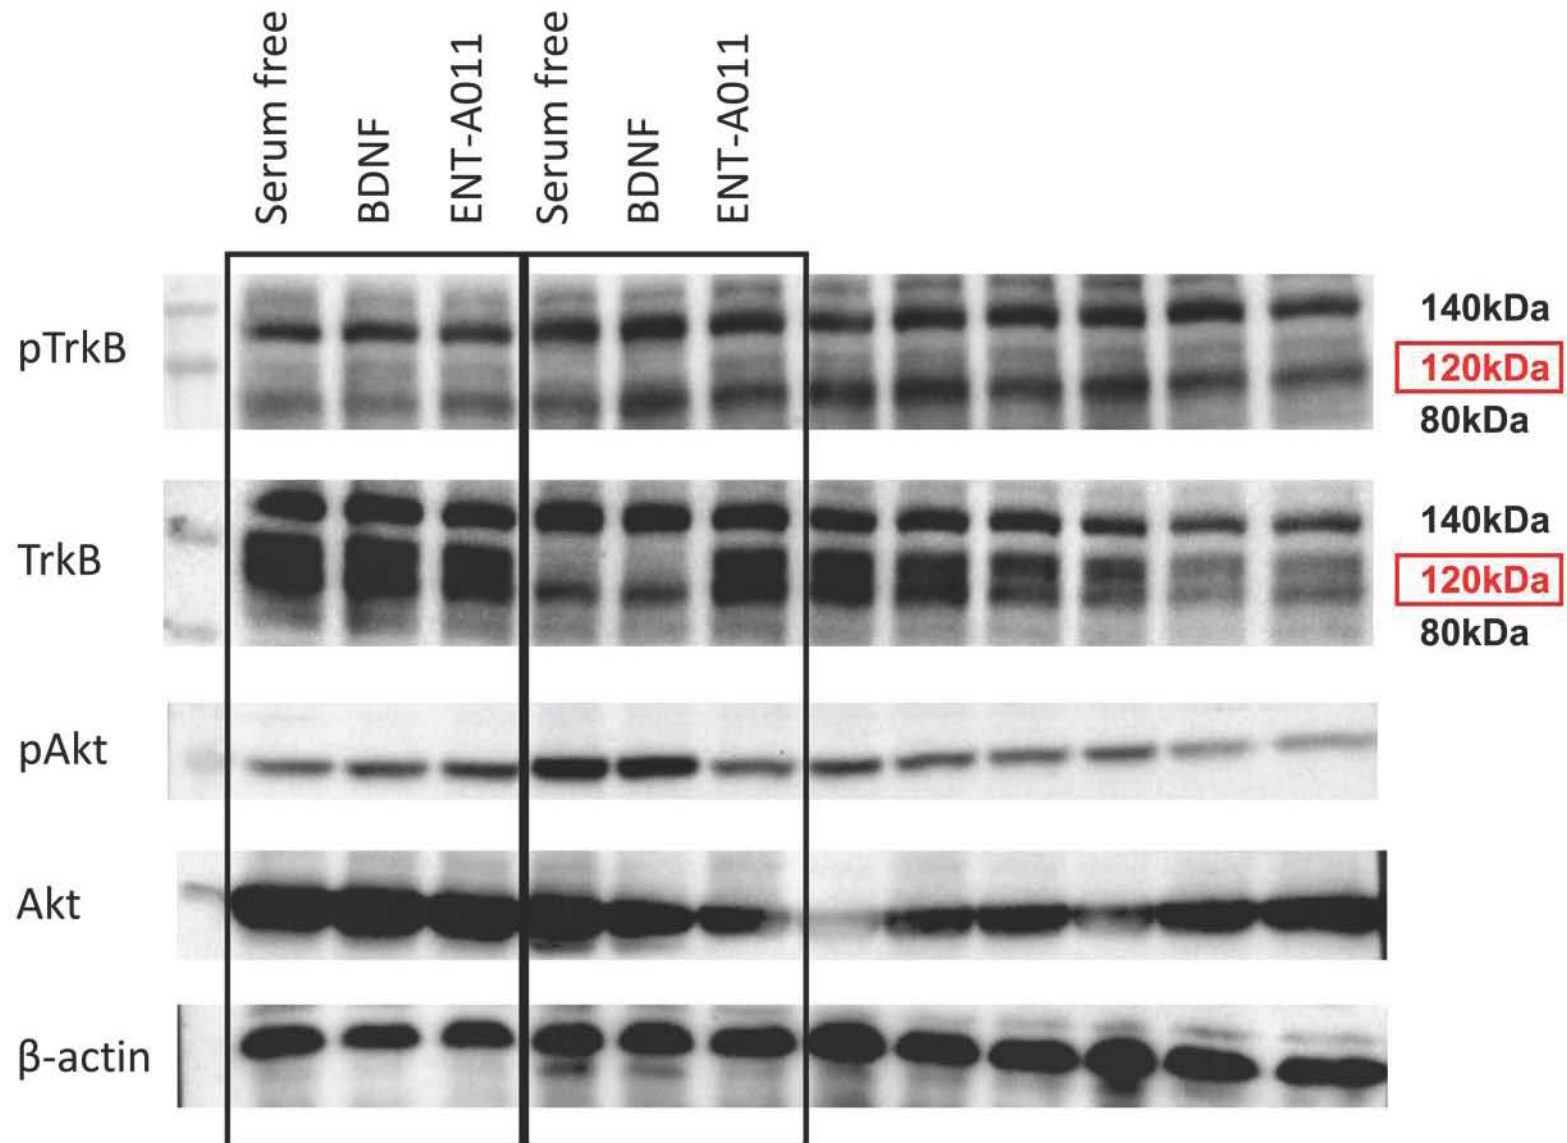

Figure 1A\_WB7

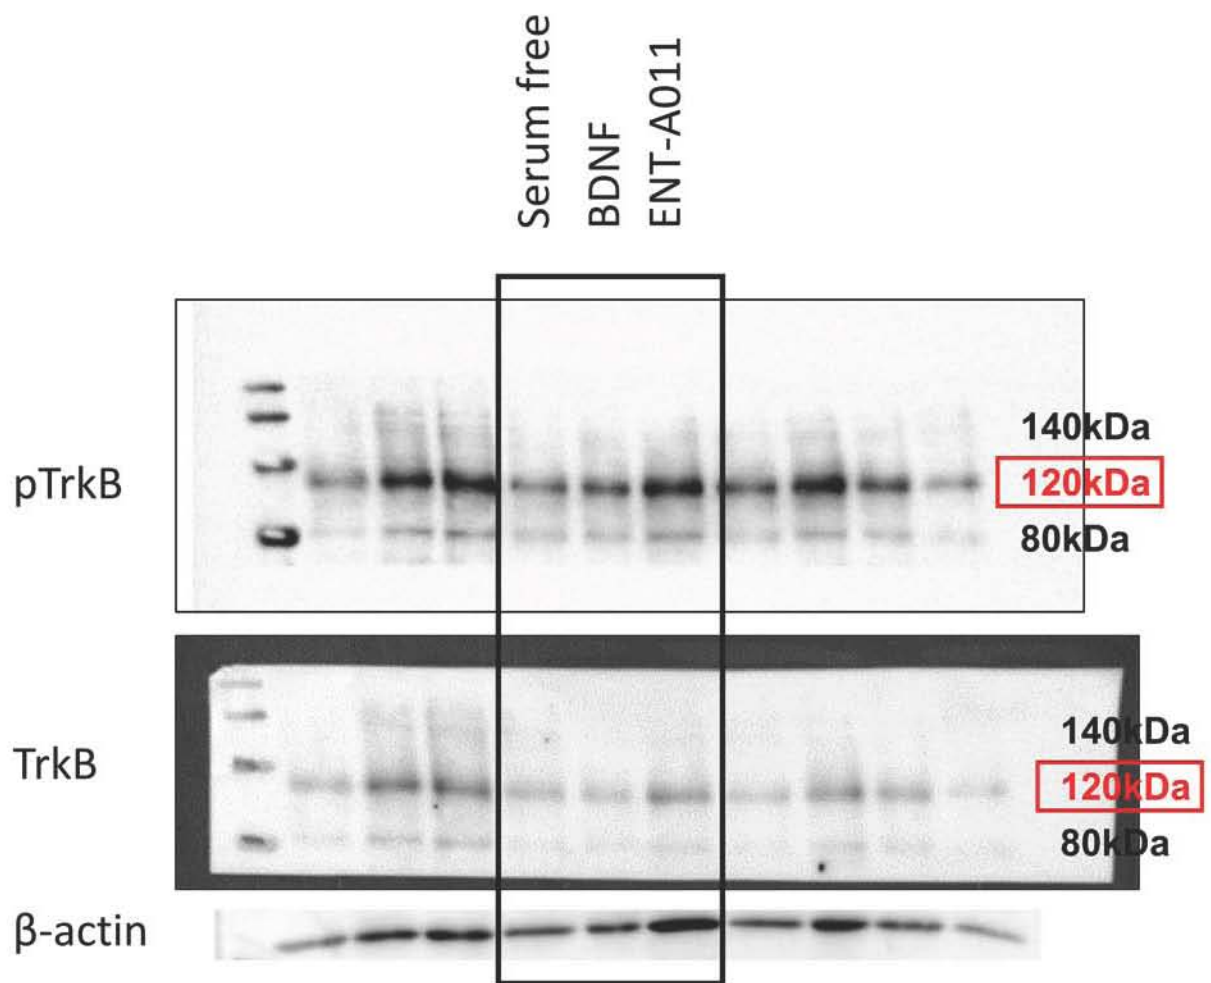



Figure 1A\_WB8

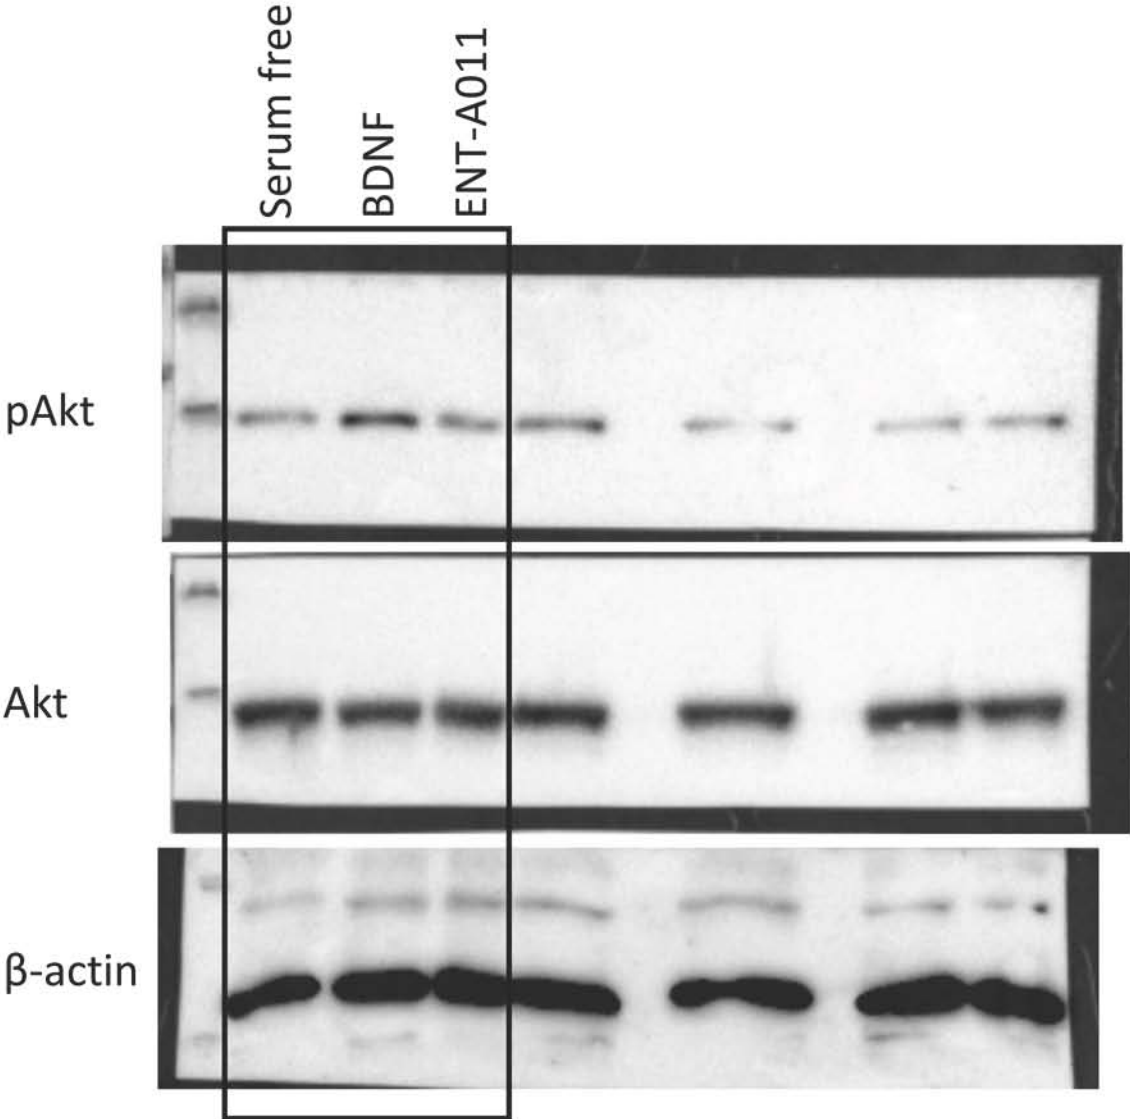



Figure 1A\_WB9

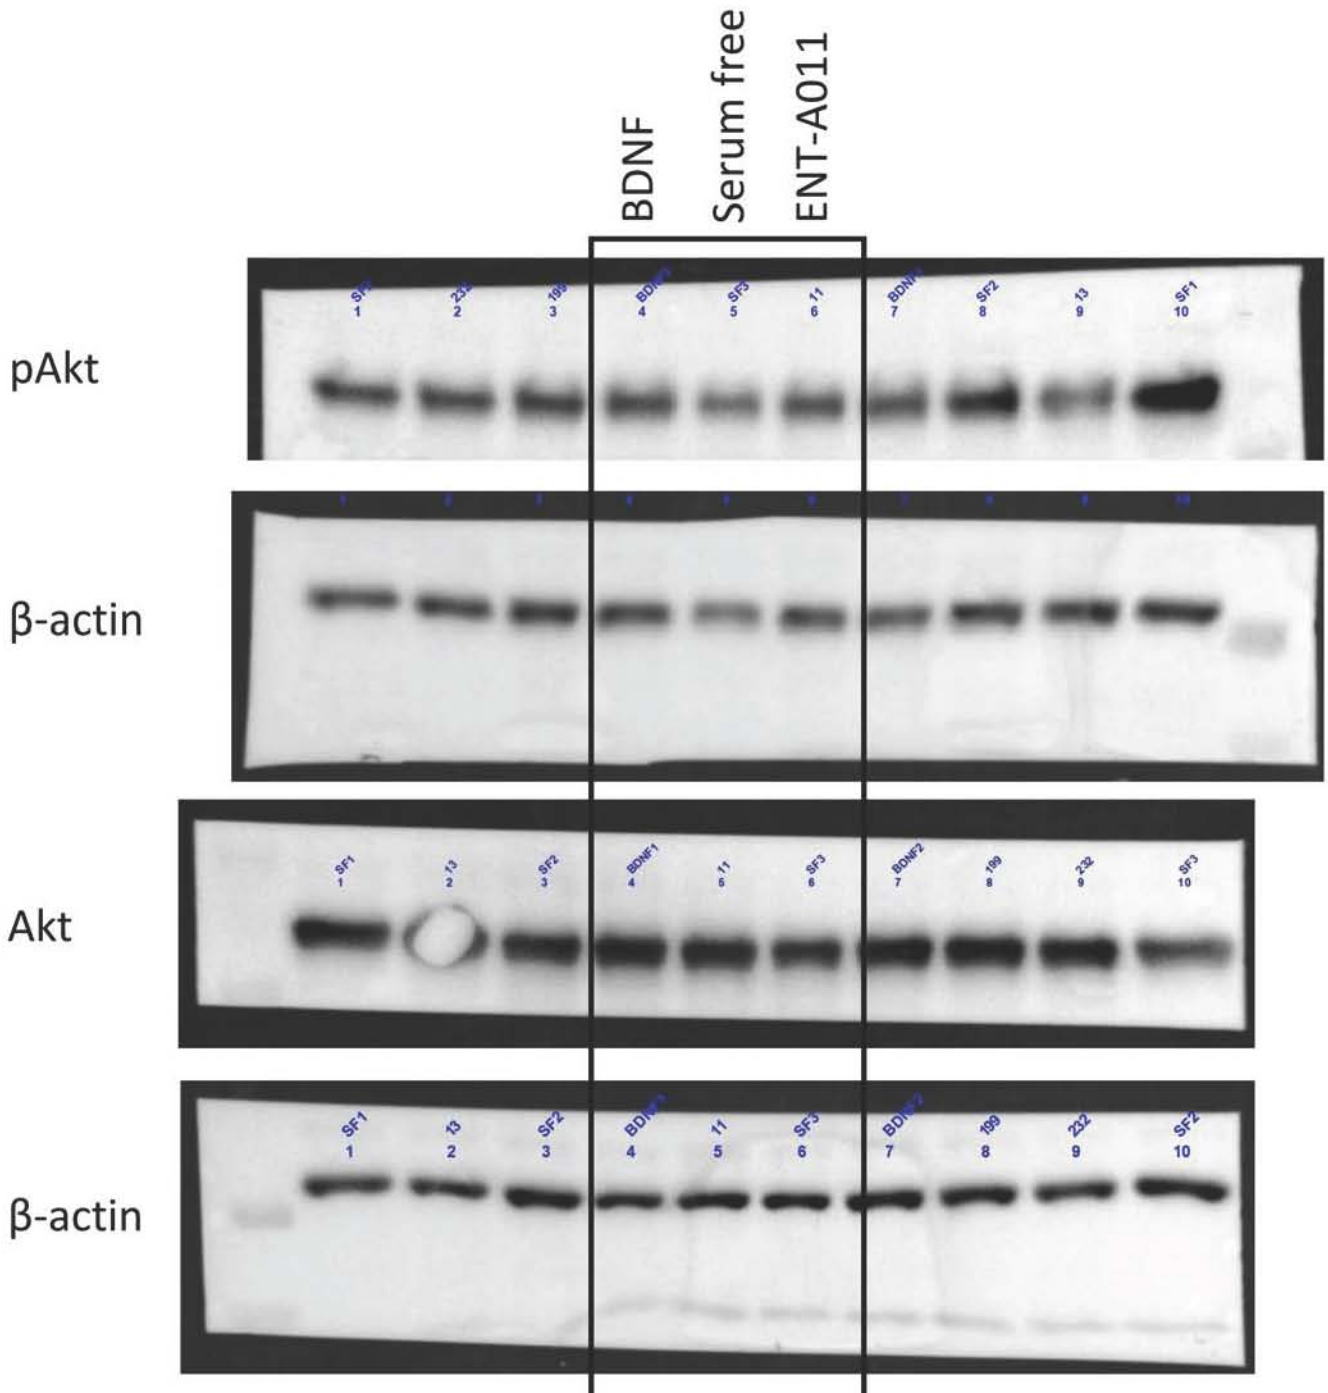

Figure 2A\_WB1

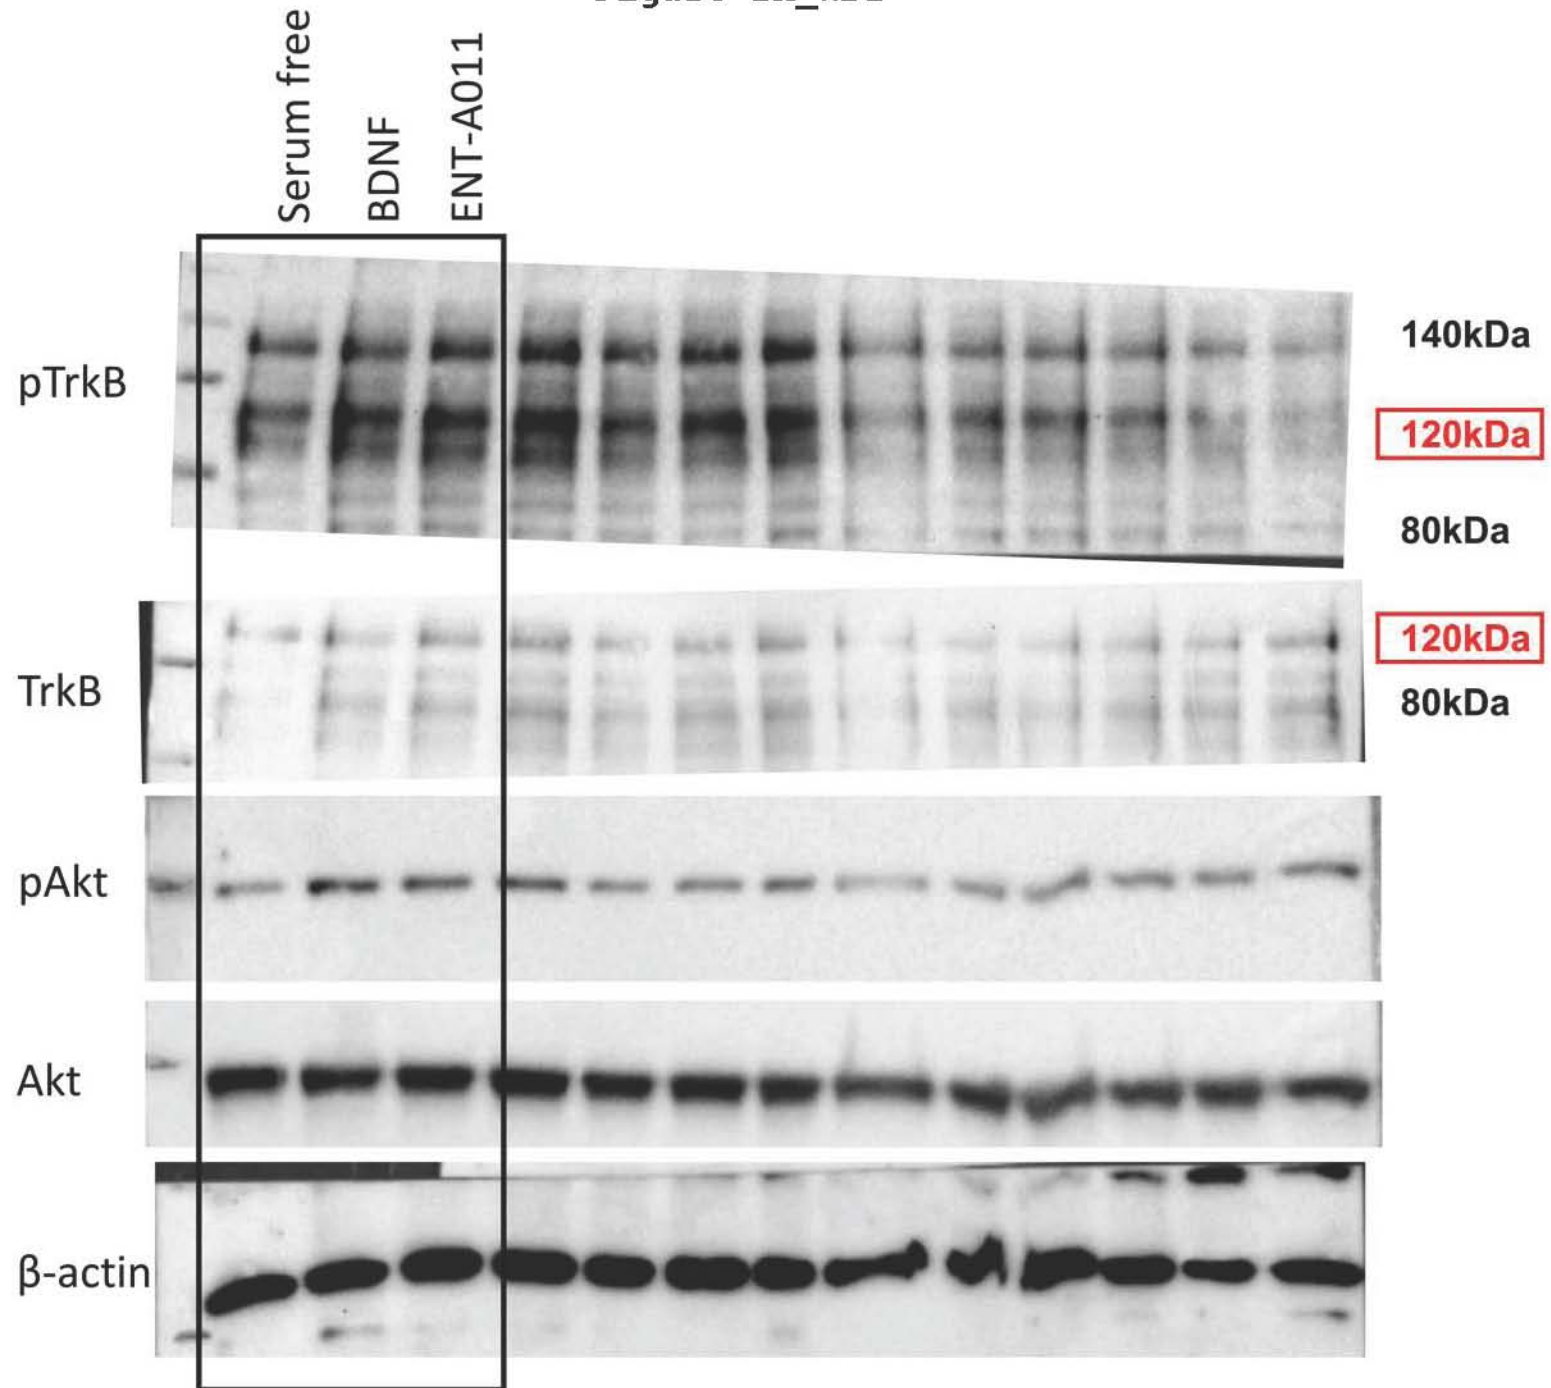

Figure 2A\_WB2

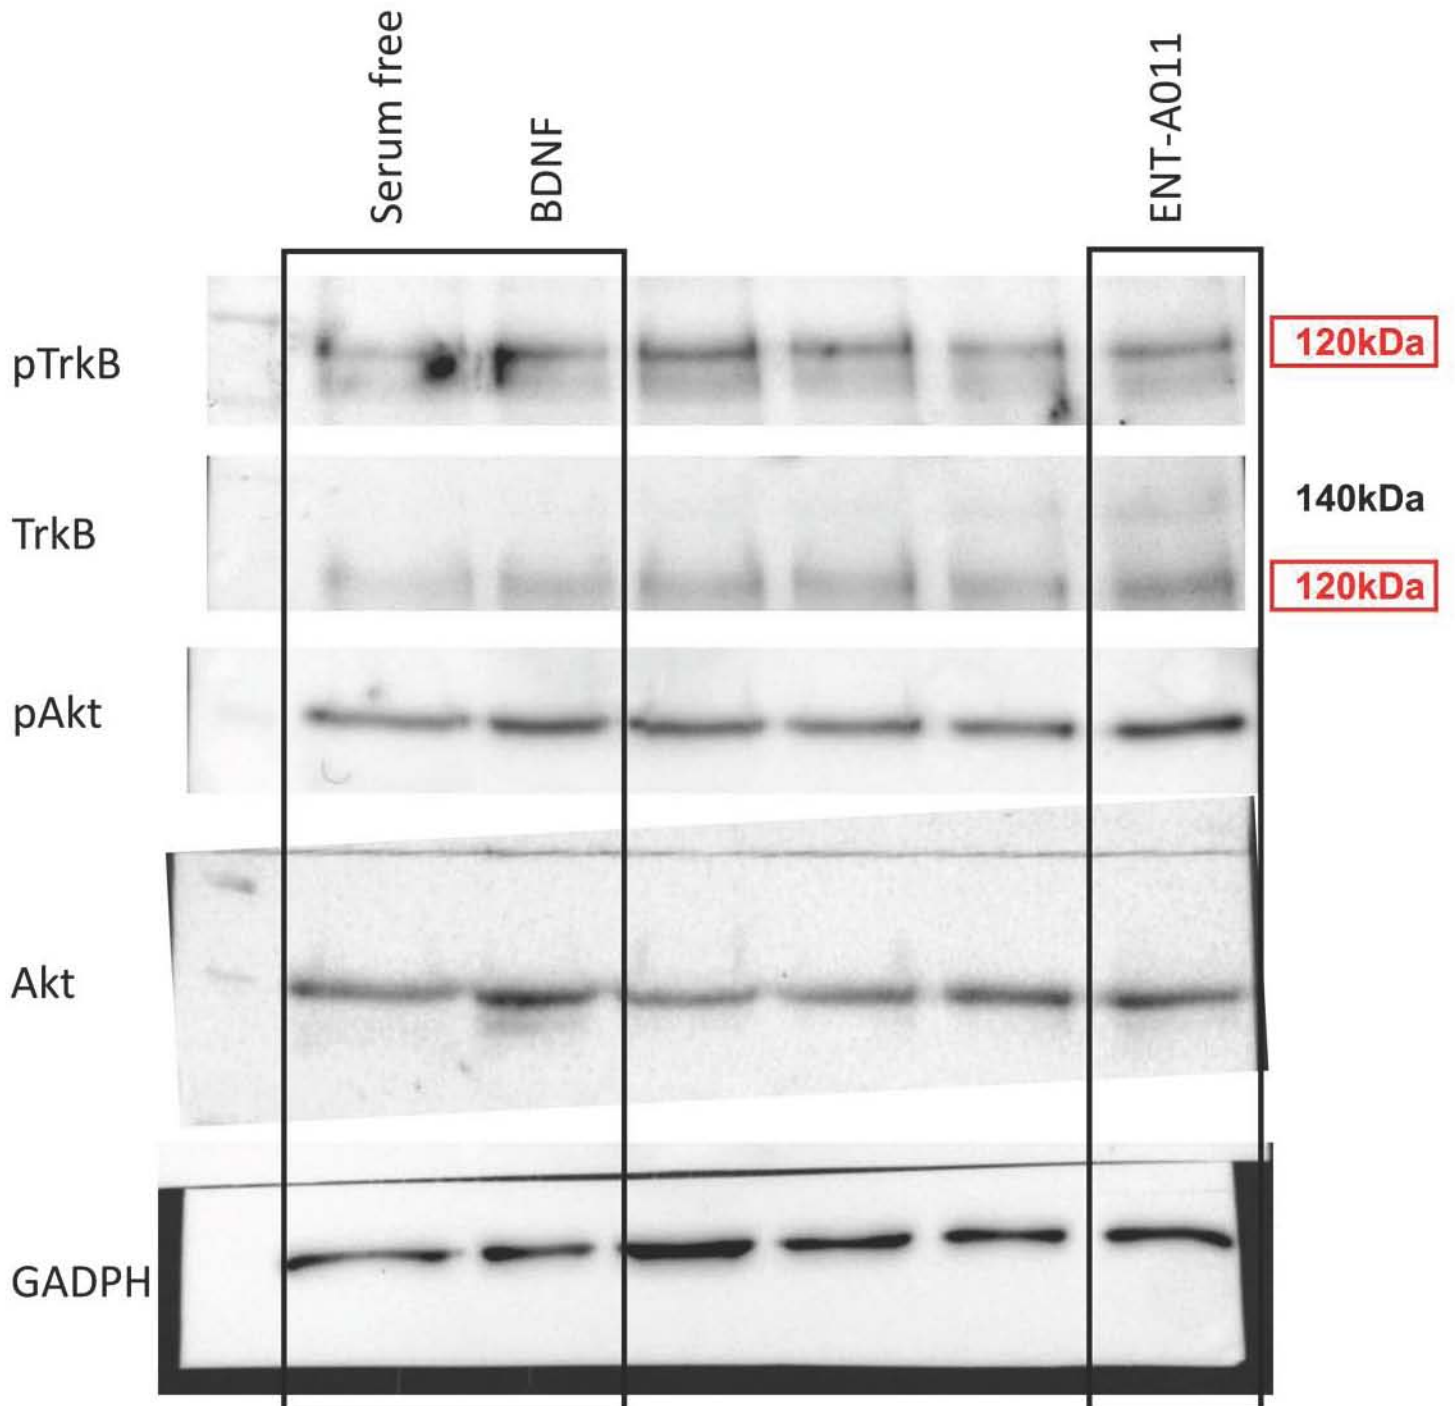

Figure 2A\_WB3

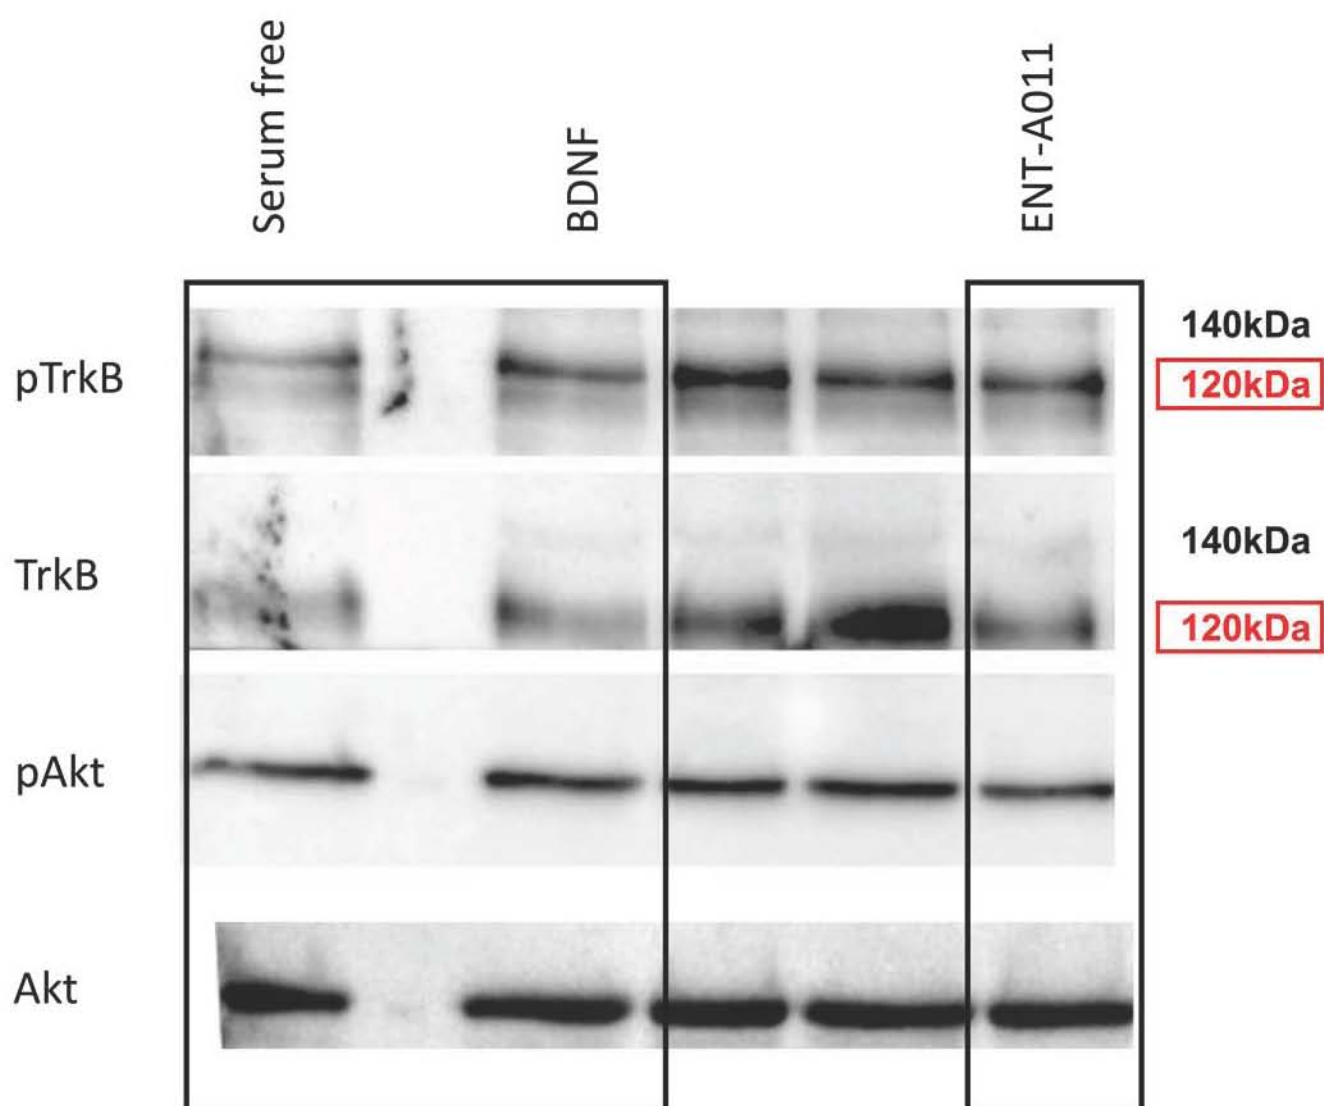

Figure 2A\_WB4

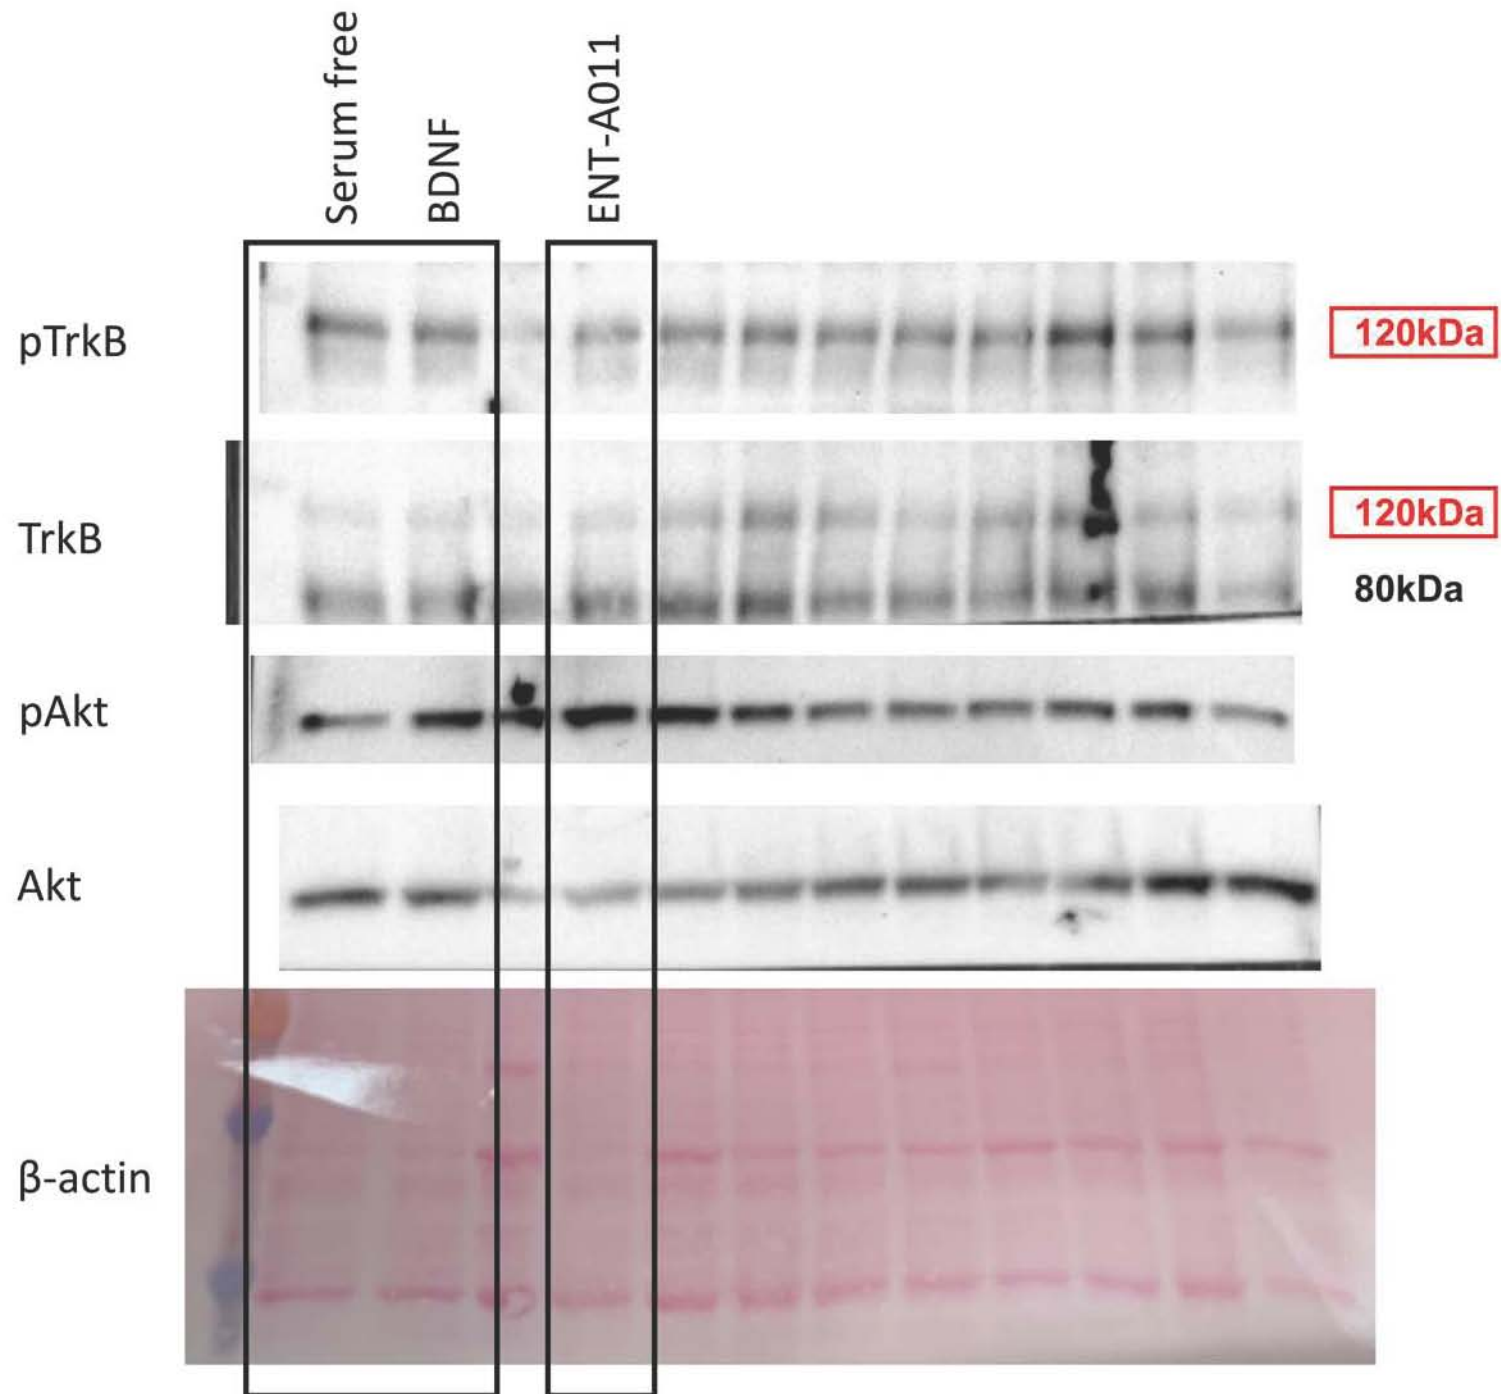

Figure 2A\_WB5

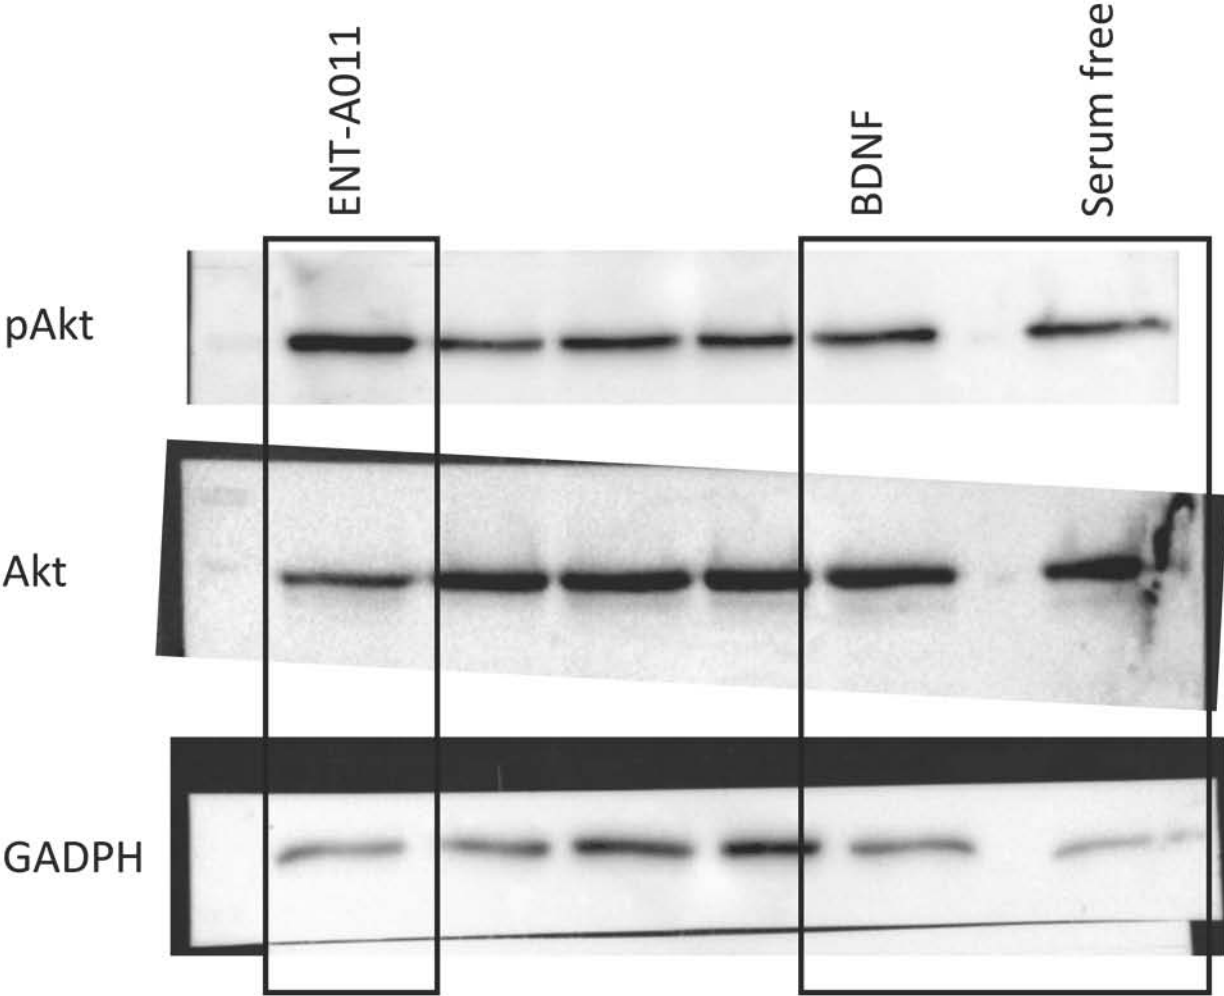

Supplement: 13287_2024_3818_MOESM4_ESM.pdf [file 13287_2024_3818_MOESM4_ESM.pdf]
